# Supplementary material for: Uncertainty-aware visualization and proximity monitoring in urban excavation: a geospatial augmented reality approach
Source: Springer Nature journal article supplement (doi:10.1186/2213-7459-1-2), 2013-06-12

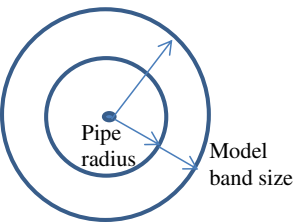

Uncertainty "halo" that encloses the pipe.

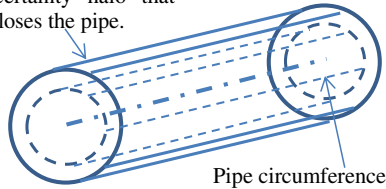

Supplement: 40327_2013_2_MOESM5_ESM.pdf [file 40327_2013_2_MOESM5_ESM.pdf]
